# Supplementary material for: Glutathione binding to the plant AtAtm3 transporter and implications for the conformational coupling of ABC transporters
Source: eLife. 2022 Mar 25;11:e76140. doi: 10.7554/eLife.76140 (PMC9000953; doi:10.7554/eLife.76140)
Supplement: Figure 1—source data 1. [file elife-76140-fig1-data1.xlsx]

## Sheet: Sheet1
	DDM
	[MgATP] (mM)	no substrate			2.5 mM GSSG			10 mM GSH
	0	0	0	0	0	0	0	0	0	0
	0.1	36.9	37.7	36.2	46	52.9	49.8	60.5	62.7	58
	0.2	60.5	60.9	58.8	73.6	79.9	74.3	95.9	95.6	95.4
	0.5	83.2	82.5	81.1	83.9	98.3	92.3	124.5	125.9	124.3
	1	93.9	88.3	90.3	102	105.4	102.4	132.5	131.5	137.4
	2	96	93.3	97.3	103.7	108.6	106.6	140.1	140.3	140.1
	5	103.4	99.2	101.5	113.5	114.9	114.1	153.1	144.2	147.4
	10	102.5	98.9	101.1	120.4	119.9	114.1	160.6	151.5	154.5
	MSP
	[MgATP] (mM)	no substrate			2.5 mM GSSG			10 mM GSH
	0	0	0	0	0	0	0	0	0	0
	0.1	2.6	3.8	5	19.27	19.5	19.8	22.7	22.1	20.6
	0.2	6.3	5.3	4.9	26.27	28.7	27.1	29.8	30.7	30.5
	0.5	7.3	6.7	7.5	31.07	33.6	31.2	42.5	38.6	38.6
	1	6.1	7	7.3	31.67	34.1	33.5	40.5	40.5	37.8
	2	7.4	9.6	9	31.67	33.7	30.5	37.9	41.5	38.5
	5	8.4	6.1	8.4	27.47	32.6	28.9	38.3	35.2	33.8
	10	7.4	4.9	6.4	26.37	26.4	37.1	34.3	31.9	32.7
